# Supplementary material for: Regulation of connexin 43 by interleukin 1β in adult rat cardiac fibroblasts and effects in an adult rat cardiac myocyte: fibroblast co-culture model
Source: PubMed Central journal article supplement (PMC6940628; doi:10.1016/j.heliyon.2019.e03031), 2019-12-30

Supplementary figure 1.

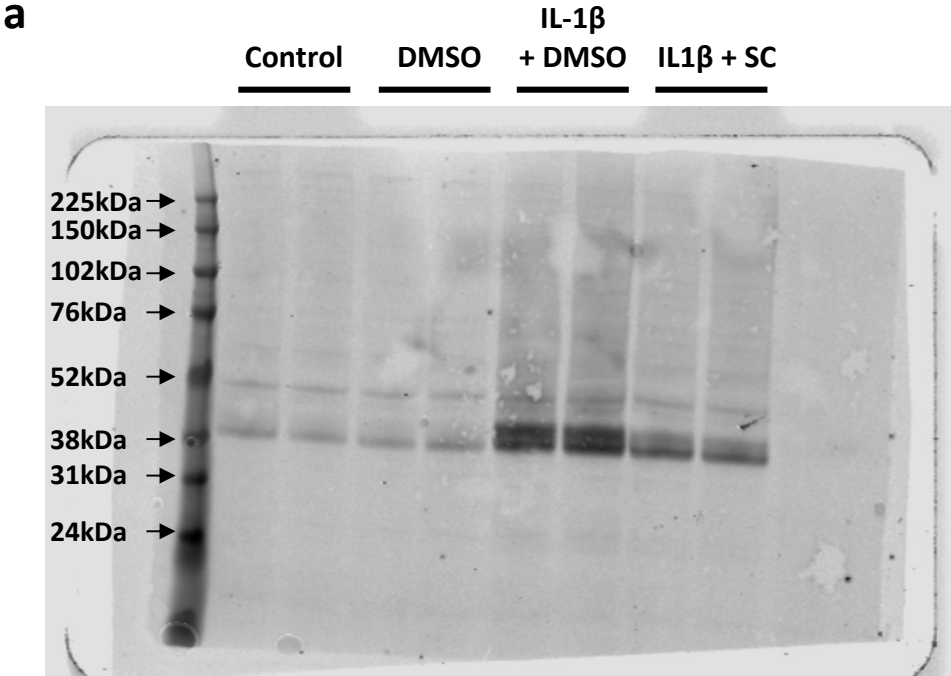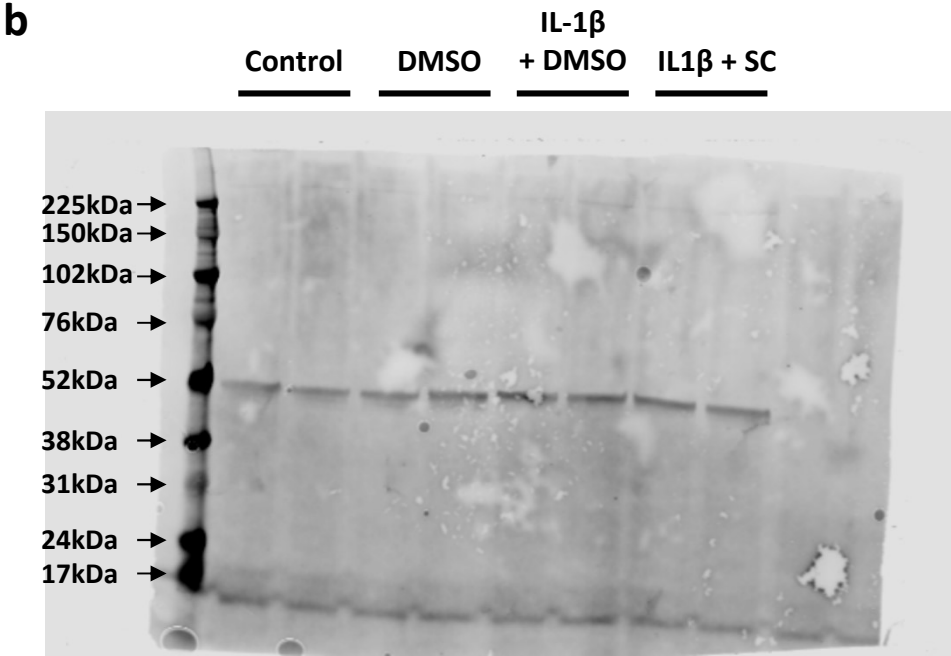

Supplement: mmc1.pdf [file mmc1.pdf]
